# Supplementary material for: Laboratory Diagnosis of Bovine Abortions Caused by Non-Maintenance Pathogenic Leptospira spp.: Necropsy, Serology and Molecular Study Out of a Belgian Experience
Source: MDPI journal article supplement (doi:10.3390/pathogens9060413), 2020-05-26
Supplement: s1 [file s1]

**Table S3.** Comparison of the results of the PCR performed on fetuses and the results of microscopic agglutination test performed on the serum of the corresponding dams for the diagnosis of leptospirosis.

|                |    | Positivity cut-off of MAT |                     |                     |                     |
|----------------|----|---------------------------|---------------------|---------------------|---------------------|
| N fetuses      |    | 1/10                      | 1/100               | 1/300               | 1/1000              |
|                |    | n positive MAT            | n positive MAT      | n positive MAT      | n positive MAT      |
| PCR positive   | 27 | 26                        | 26                  | 23                  | 14                  |
| PCR negative   | 36 | 14                        | 13                  | 6                   | 3                   |
| TOTAL          | 63 | 40                        | 39                  | 29                  | 17                  |
| Ser (95% CI)   |    | 96.30 (81.03-99.91)       | 96.30 (81.03-99.91) | 85.19 (66.27-95.81) | 51.86 (31.95-71.33) |
| Spr (95% CI)   |    | 61.11 (43.46-76.86)       | 63.89 (46.22-79.18) | 83.33 (67.19-96.63) | 91.67 (77.53-98.25) |
| Kappa (95% CI) |    | 0.54 (0.31-0.77)          | 0.57 (0.34-0.80)    | 0.68 (0.43-0.92)    | 0.46 (0.22-0.69)    |
