# Supplementary material for: Laboratory Diagnosis of Bovine Abortions Caused by Non-Maintenance Pathogenic Leptospira spp.: Necropsy, Serology and Molecular Study Out of a Belgian Experience
Source: MDPI journal article supplement (doi:10.3390/pathogens9060413), 2020-05-26
Supplement: s1 [file s1]

**Table S2.** Cross-reactions between serovars of *Leptospira* spp. observed on 75 dams' sera submitted to MAT (cut-off of 1/10).

[illegible]
